# Supplementary material
Source: publisher site journal article supplement (https://www.dovepress.com/article/500810)
Supplement: Supplementary file 1 [file get_supplementary_file.php]

**Table 1.** The qPCR primer sequence used in this article.

| Gene | Forward Primer | Reverse Primer |
| --- | --- | --- |
| Ptgs2 (mouse) | TTCAACACACTCTATCACTGGC | AGAAGCGTTTGCGGTACTCAT |
| Ptgs2 (rat) | CCAACCTCTCCTACTACACC | CCTTATTTCCTTTCACACCCA |
| mt-Co1 (mouse) | ACTACTAACAGACCGCAACC | TGAAGCACGATGTCAAGG |
| mt-Nd1 (mouse) | GTTGGTCCATACGGCATTT | TTGTTTGGGCTACGGCTC |
| mt-Cytb (mouse) | TAGCAATCGTTCACCTCCTC | CTGGGTCTCCTAGTATGTCTGG |
| mt-Atp6 (mouse) | AACCGTCTCCATTCTTTC | ATAGTTGGGTAGTAGGTGTAA |
| Il6 (mouse) | TAGTCCTTCCTACCCCAATTTCC | TTGGTCCTTAGCCACTCCTTC |
| Tnfa (mouse) | CCCTCACACTCAGATCATCTTCT | GCTACGACGTGGGCTACAG |
| Il1b (mouse) | GCAACTGTTCCTGAACTCAACT | ATCTTTTGGGGTCCGTCAACT |
| Col1a1 (mouse) | GCTCCTCTTAGGGGCCACT | CCACGTCTCACCATTGGGG |
| Col3a1 (mouse) | CTGTAACATGGAAACTGGGGAAA | CCATAGCTGAACTGAAAACCACC |


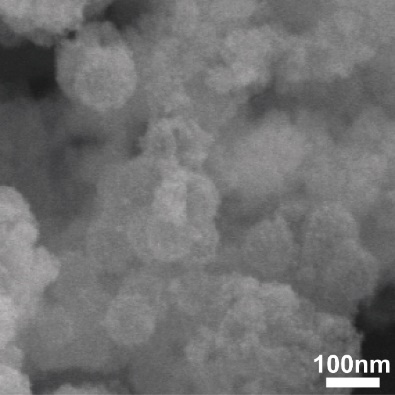


**Figure S1.** High Magnification SEM Image of Se@PSN.





**Figure S2.** Zeta Potential of Solid Se@SiO2 and Se@PSN.


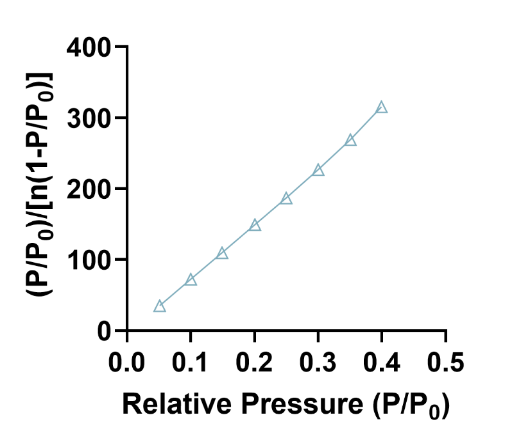


**Figure S3.** Multipoint Brunauer-Emmett-Teller (BET) Analysis of Se@PSN.





**Figure S4.** Hydrodynamic Size Distribution of Solid Se@SiO2 and Se@PSN.


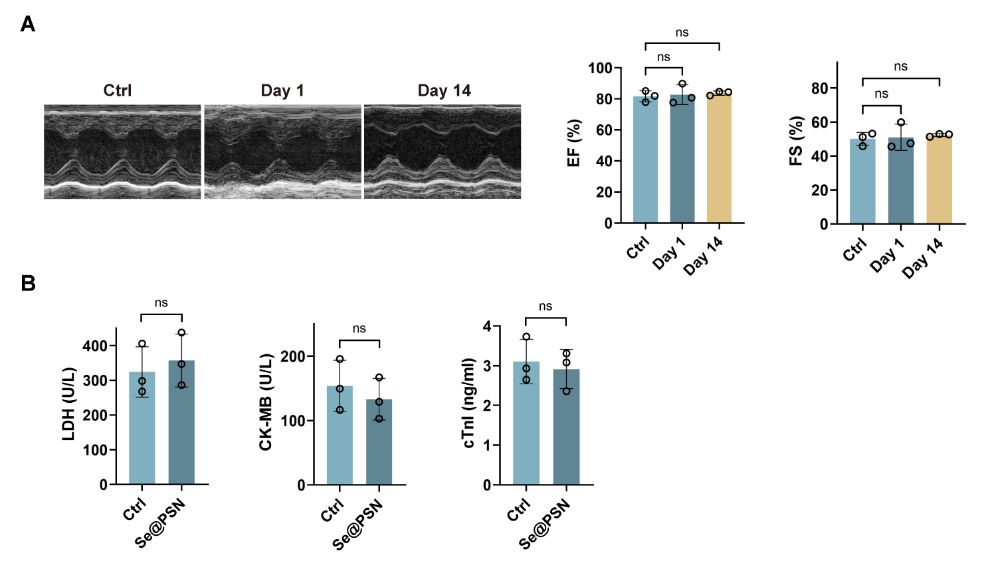


**Figure S5.** Effect of high-dose Se@PSN injection on the heart. A) Echocardiography images and EF and FS of mice injected with a high dose of Se@PSN into the myocardium at days 1 and 14 post-injection (n=3; ns, p > 0.05). B) Serum levels of cardiac injury markers in mice from the high-dose Se@PSN injection group compared to the control group (n=3; ns, p > 0.05).


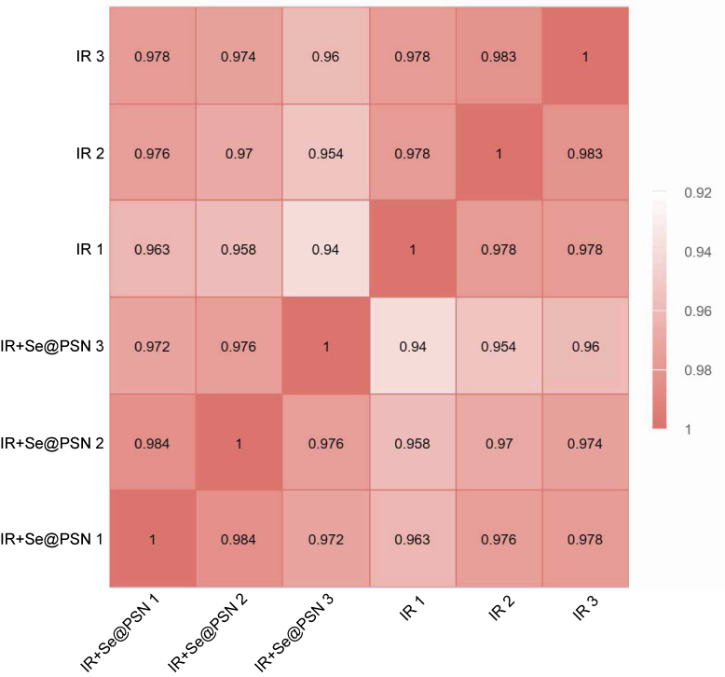


**Figure S6.** Pearson Correlation Heatmap of Transcriptomic Data.


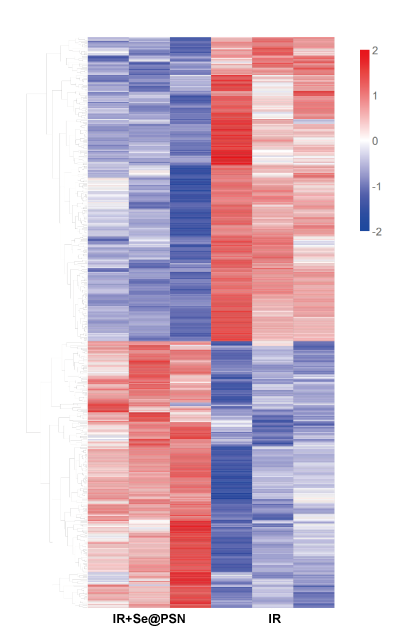


**Figure S7.** Heatmap of DEGs in the IR+Se@PSN Group Compared to the IR Group.


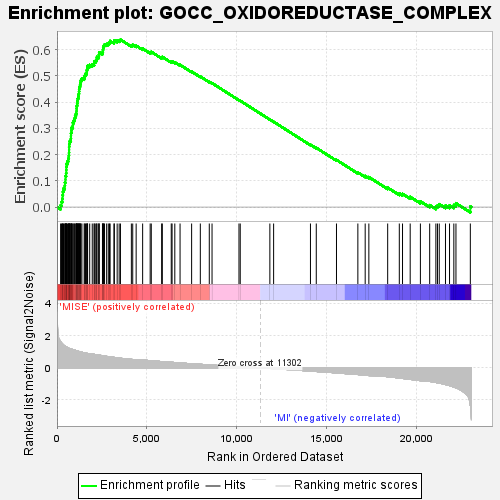

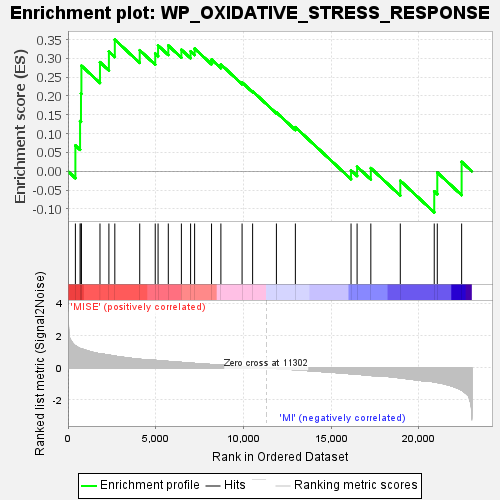


**Figure S8.** GSEA Plot of the Oxidoreductase and Oxidative Stress Pathway (IR+Se@PSN Group *vs* IR Group).


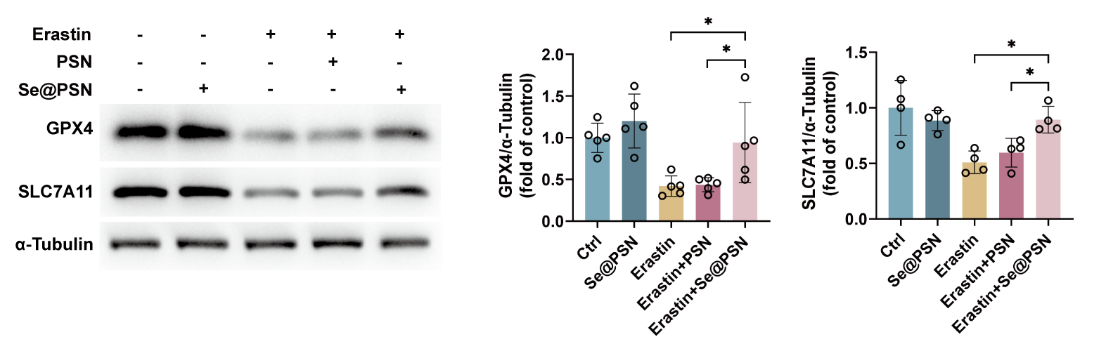


**Figure S9.** GPX4 and SLC7A11 Expression in H9c2 Cells from Control, Se@PSN, Erastin, Erastin+PSN and Erastin+Se@PSN Groups (n=4-5, *p < 0.05).


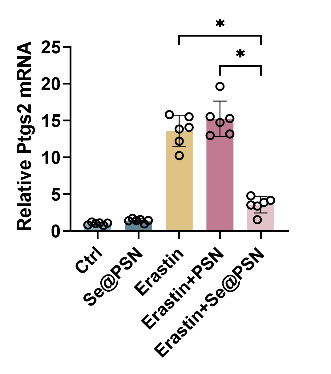


**Figure S10.** Relative mRNA Levels of Ptgs2 in H9c2 Cells from Different Groups (n=6, *p < 0.05).


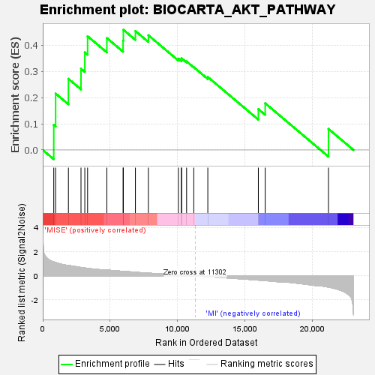

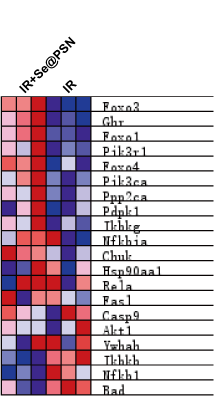


**Figure S11.** GSEA Plot of the Akt Pathway and Heatmap Illustrating Genes Related to the Akt Pathway in the IR+Se@PSN Group Compared to the IR Group.


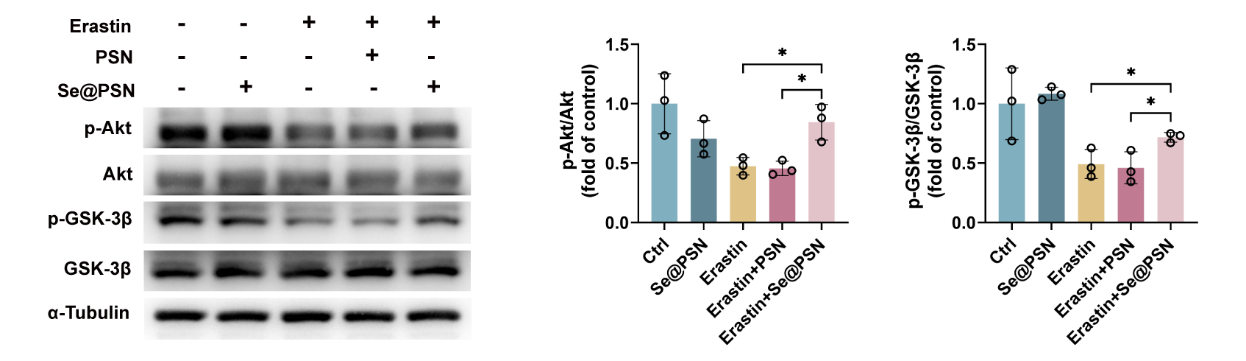


**Figure S12.** p-Akt and p-GSK-3β Expression in H9c2 Cells from Control, Se@PSN, Erastin, Erastin+PSN, and Erastin+Se@PSN Groups (n=3, *p < 0.05).


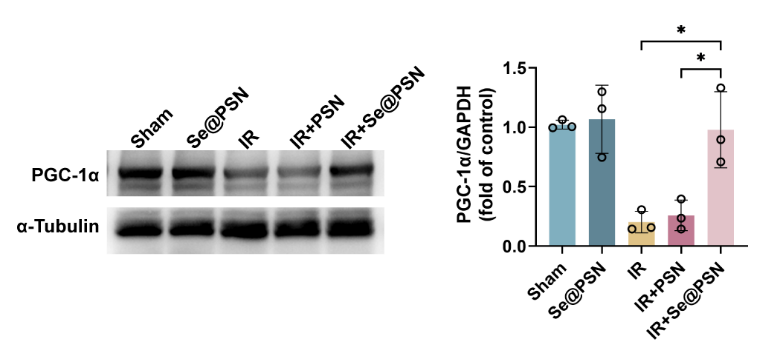


**Figure S13.** PGC-1α Expression in Myocardium from Sham, Se@PSN, IR, IR+PSN and IR+Se@PSN Groups (n=3, *p < 0.05).


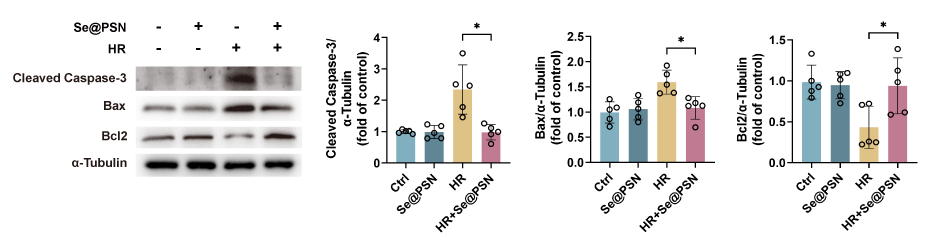


**Figure S14.** Apoptosis-Related Protein Expression in H9c2 Cells of Control, Se@PSN, HR and HR+Se@PSN Groups (n=5, *p < 0.05).


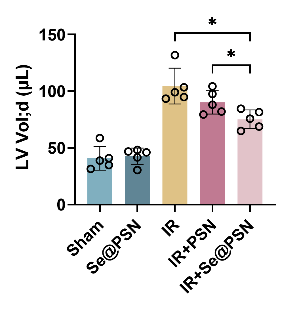

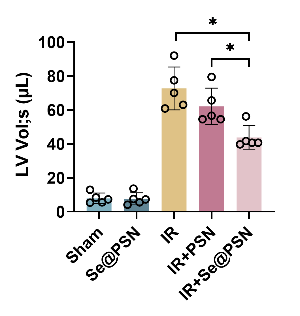


**Figure S15.** LV Vol;d and LV Vol;s of Mice from Different Groups at Day 14 Post-IR (n=5, *p < 0.05).


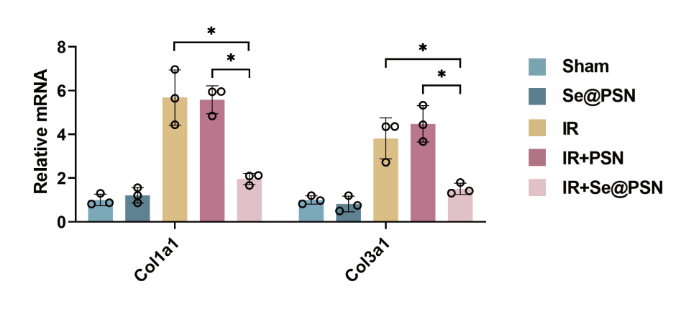


**Figure S16.** Relative mRNA Levels of Col1a1 and Col3a1 in Myocardial from Different Groups (n=3, *p < 0.05).
